# Supplementary material for: COVID-19-related hospital admission in spouses of partners in at-risk occupations
Source: PubMed Central journal article supplement (PMC10621900; doi:10.5271/sjweh.4080), 2023-03-30
Supplement: SJWEH-49-193-S001.pdf [file SJWEH-49-193-S001.pdf]

## COVID-19-related hospital admission in spouses of partners in at-risk occupations<sup>1</sup>

by Jens Peter Ellekilde Bonde, MD,<sup>2</sup> Luise Mølenberg Begtrup, PhD, David Coggon, DM, Johan Høy Jensen, PhD, Esben Meulengracht Flachs, PhD, Kristina Jakobsson, PhD, Christel Nielsen, PhD, Kerstin Nilsson, PhD, Lars Rylander, PhD, Andreas Vilhelmsson, PhD, Kajsa Ugelvig Petersen, PhD, Sandra Søggaard Tøttenborg, PhD

1. *Supplementary tables*
2. *Correspondence to: Jens Peter Bonde, Department of Occupational and Environmental Medicine, Bispebjerg and Frederiksberg Hospital, Bispebjerg Bakke 23, DK-Copenhagen 2400 NV, Denmark. [E-mail: Jens.Peter.Ellekilde.Bonde@regionh.dk]*

Table S1. High-risk 4-digit DISCO-04 occupational groups defined by an adjusted incidence rate ratio (IRR) above 1.5 and p-value < 0.05 compared to a reference group of low-level exposed employees<sup>1</sup> in a national cohort of employees aged 20–69. Stratification by sex.

| Occupation<br>(ISCO-08 label)                | DISCO-08<br>code | Men  |                | Women  |                 |
|----------------------------------------------|------------------|------|----------------|--------|-----------------|
|                                              |                  | N    | IRR (95% CI)   | N      | IRR (95% CI)    |
| Human Resource Managers                      | 1212             | 1256 | 2.95 (1.5-6.0) |        |                 |
| Construction Managers                        | 1323             | 3107 | 2.10 (1.2-3.7) |        |                 |
| Restaurant Managers                          | 1412             | 440  | 4.12 (1.5-11)  |        |                 |
| Generalist Medical Practitioners             | 2211             | 8423 | 2.04 (1.4-3.1) |        |                 |
| Specialist Medical Practitioners             | 2212             |      |                | 487    | 6.36 (2.3-18)   |
| Nursing Professionals                        | 2221             | 2536 | 1.96 (1.0-3.8) | 60 054 | 2.10 (1.6-2.8)  |
| Audiologists and Speech Therapists           | 2266             | 89   | 7.15 (1.0-51)  |        |                 |
| Primary School Teachers                      | 2341             |      |                | 51 275 | 1.51 (1.1-2.0)  |
| Early Childhood Educators                    | 2343             |      |                | 56 234 | 1.56 (1.2-2.0)  |
| Other Music Teachers                         | 2354             |      |                | 833    | 3.31 (1.0-10)   |
| Other Arts Teachers                          | 2355             | 55   | 9.18 (1.3-66)  |        |                 |
| Teaching Professionals, Other                | 2359             | 763  | 2.95 (1.1-7.9) |        |                 |
| Psychological Therapists                     | 2634             | 1768 | 2.37 (1.0-5.4) |        |                 |
| Translators and Interpreters                 | 2643             |      |                | 823    | 4.81 (2.1-11.0) |
| Administrative and Executive Secretaries     | 3343             | 3684 | 2.15 (1.3-3.5) |        |                 |
| Social Work Associate Professionals          | 3412             | 1867 | 2.56 (1.4-4.6) |        |                 |
| Photographers                                | 3431             |      |                | 235    | 7.31 (1.8-30)   |
| Chefs                                        | 3434             |      |                | 1534   | 2.47 (1.0-6.0)  |
| Building Caretakers                          | 5153             |      |                | 1896   | 2.55 (1.2-5.5)  |
| Nursing Aides                                | 5321             | 9422 | 1.66 (1.2-2.4) | 35 212 | 2.03 (1.6-2.6)  |
| Home-Based Personal Care Workers             | 5322             | 8332 | 1.78 (1.2-2.6) | 78 116 | 1.55 (1.2-1.9)  |
| Air Conditioning and Refrigeration Mechanics | 7127             | 1607 | 2.28 (1.0-5.1) |        |                 |
| Information and Communication Services       | 7422             | 489  | 3.79 (1.2-12)  |        |                 |
| Dairy Product Makers                         | 7513             |      |                | 857    | 3.19 (1.0-10)   |
| Tobacco Prepares and Product Makers          | 7516             |      |                | 109    | 7.89 (1.1-57)   |
| Sewing and Related Workers                   | 7533             | 59   | 9.55 (1.3-69)  |        |                 |

|                                                   |      |        |                |      |                |
|---------------------------------------------------|------|--------|----------------|------|----------------|
| Food Machine Operators                            | 8160 | 12 184 | 1.75 (1.2-2.5) |      |                |
| Packing, Bottling and Labelling Machine Operators | 8183 |        |                | 1035 | 2.77 (1.1-6.8) |
| Bus Drivers                                       | 8331 | 9208   | 2.19 (1.6-2.9) |      |                |
| Domestic Cleaners and Helpers                     | 9111 |        |                | 665  | 4.64 (1.9-12)  |
| Vehicle Cleaners                                  | 9122 |        |                | 165  | 7.89 (1.9-33)  |
| Odd-Job Persons                                   | 9622 | 1022   | 2.59 (1.1-6.3) |      |                |

<sup>1</sup> Low likelihood of occupational SARS-CoV-2 exposure according to a population-based expert-rated job exposure matrix (16)

Table S2. Incidence rate ratio (IRR) with 95% confidence intervals (CI) for Covid-19 related hospital admission in spouses of partners with intermediate- and high-risk occupations<sup>1</sup>. Analyses including individuals without partners in the reference group.

|                                                                           | N employees | All waves  |                  |         | 1. wave<br>week 8-32 2020<br>Alpha variant dominates |                  |         | 2. wave<br>week 33-52 2020, 1-4 2021<br>Beta variant dominates |                  |         | 3. wave<br>week 5-26 2021<br>Beta variant dominates |                  |         | 4. wave<br>Week 27-50 2021<br>Delta variant dominates |                  |         |
|---------------------------------------------------------------------------|-------------|------------|------------------|---------|------------------------------------------------------|------------------|---------|----------------------------------------------------------------|------------------|---------|-----------------------------------------------------|------------------|---------|-------------------------------------------------------|------------------|---------|
|                                                                           |             | N Covid-19 | IRR <sup>2</sup> | 95% CI  | N Covid-19                                           | IRR <sup>2</sup> | 95% CI  | N Covid-19                                                     | IRR <sup>2</sup> | 95% CI  | N Covid-19                                          | IRR <sup>2</sup> | 95% CI  | N Covid-19                                            | IRR <sup>2</sup> | 95% CI  |
| Male and female spouses                                                   |             |            |                  |         |                                                      |                  |         |                                                                |                  |         |                                                     |                  |         |                                                       |                  |         |
| Partner with high-risk job <sup>1</sup>                                   | 23 581      | 64         | 1.77             | 1.3-2.4 | <15                                                  | 1.86             | 0.9-3.7 | 34                                                             | 2.24             | 1.5-3.4 | <15                                                 | 1.90             | 1.0-3.5 | <5                                                    | 0.54             | 0.2-1.5 |
| Partner with intermediate-risk job                                        | 117 296     | 172        | 1.12             | 0.9-1.4 | 24                                                   | 0.98             | 0.6-1.7 | 70                                                             | 1.18             | 0.9-1.6 | 43                                                  | 1.20             | 0.8-1.8 | 35                                                    | 1.01             | 0.7-1.6 |
| Referents (No employed partner or partner with low-risk job) <sup>3</sup> | 51 930      | 303        | 1.00             | -       | 45                                                   | 1.00             | -       | 117                                                            | 1.00             | -       | 65                                                  | 1.00             | -       | 76                                                    | 1.00             | -       |
| Male spouses                                                              |             |            |                  |         |                                                      |                  |         |                                                                |                  |         |                                                     |                  |         |                                                       |                  |         |
| Partner with high-risk job <sup>1</sup>                                   | 19 436      | 55         | 1.66             | 1.2-2.3 | 11                                                   | 2.05             | 1.0-4.2 | 29                                                             | 1.96             | 1.3-3.0 | <15                                                 | 2.09             | 1.1-4.1 | <5                                                    | 0.48             | 0.2-1.6 |
| Partner with intermediate-risk job                                        | 42 694      | 74         | 1.04             | 0.8-1.4 | 13                                                   | 1.05             | 0.5-2.1 | 31                                                             | 1.00             | 0.7-1.5 | 15                                                  | 1.19             | 0.6-2.2 | 15                                                    | 1.10             | 0.6-2.0 |
| Referents (No employed partner or partner with low-risk job) <sup>3</sup> | 25 970      | 164        | 1.00             | -       | 26                                                   | 1.00             | -       | 70                                                             | 1.00             | -       | 31                                                  | 1.00             | -       | 37                                                    | 1.00             | -       |
| Female spouses                                                            |             |            |                  |         |                                                      |                  |         |                                                                |                  |         |                                                     |                  |         |                                                       |                  |         |
| Partner with high-risk job <sup>1</sup>                                   | 4145        | 9          | 1.80             | 0.9-3.6 | < 5                                                  | 1.66             | 0.2-13  | 5                                                              | 2.90             | 1.1-7.4 | <5                                                  | 1.55             | 0.4-6.6 | <5                                                    | 0.70             | 0.1-5.2 |
| Partner with intermediate-risk job                                        | 74 602      | 98         | 1.17             | 0.9-1.6 | 11                                                   | 1.13             | 0.5-2.6 | 39                                                             | 1.36             | 0.9-2.2 | 28                                                  | 1.29             | 0.8-2.2 | 20                                                    | 0.84             | 0.5-1.5 |
| Referents (No employed partner or partner with low-risk job) <sup>3</sup> | 25 960      | 139        | 1.00             | -       | 19                                                   | 1.00             | -       | 47                                                             | 1.00             | -       | 34                                                  | 1.00             | -       | 39                                                    | 1.00             | -       |

<sup>1</sup> Adjusted risk above 1.5 with a p-value < 0.05 in sex-stratified analyses of all occupations at the 4-digit DISCO-08 level (n=374 for men and n=348 for women).

<sup>2</sup> Adjusted for sex, age (10 year groups), duration of education at baseline (5 groups), number of hospital admissions for one or more of 11 chronic diseases in the 10 years preceding start of the pandemic (3 groups), country of origin (4 groups), geographical region (5 groups), number of household members (5 groups), number of children < 15 years of age in the household (4 groups) probability of tobacco smoking (3 groups), bodymass index (2 groups) and completed Covid19 vaccination (time varying variable, yes/no).

<sup>3</sup> Employees with low likelihood of occupational SARS-CoV-2 exposure according to a Covid-19 job exposure matrix (sumscore for all eight rated indicators of SARS-CoV-2 workplace viral transmission = 0)(16) including same sex individuals without an employed partner.
